# Supplementary material for: The role of the vaginal microbiome in distinguishing female chronic pelvic pain caused by endometriosis/adenomyosis
Source: PubMed Central journal article supplement — Ann Transl Med. 2021 May;9(9):771. doi: 10.21037/atm-20-4586 (PMC8246188; doi:10.21037/atm-20-4586), 2021-05
Supplement: atm-09-09-771-dss.pdf [file atm-09-09-771-dss.pdf]

## Data Sharing Statement

|                     |                                                                                                                                                     |                                                                                               |
|---------------------|-----------------------------------------------------------------------------------------------------------------------------------------------------|-----------------------------------------------------------------------------------------------|
| <b>Article Info</b> | <a href="http://dx.doi.org/10.21037/atm-20-4586">http://dx.doi.org/10.21037/atm-20-4586</a>                                                         |                                                                                               |
| <b>Item</b>         | <b>Question</b>                                                                                                                                     | <b>Authors' Response<br/>(place "-" if not applicable)</b>                                    |
| 1                   | Would you like to share data collected for your study to others?                                                                                    | No                                                                                            |
| 2                   | If not, would you like to share the reason for your decision?                                                                                       | Related research has been performing further.                                                 |
| 3                   | What data in particular will be shared?                                                                                                             | No                                                                                            |
| 4                   | Any other documents will be shared? Such as study protocol, statistical analysis plan, informed consent form, clinical study report, analytic code. | No                                                                                            |
| 5                   | When will data availability begin?                                                                                                                  | N/A                                                                                           |
| 6                   | When will data availability end?                                                                                                                    | N/A                                                                                           |
| 7                   | To whom will you share the data?                                                                                                                    | Those who send an email asking for the raw data and give adequate explanation.                |
| 8                   | For what type of analysis or purpose?                                                                                                               | Exchanging ideas of research.                                                                 |
| 9                   | How or where can the data/documents be obtained?                                                                                                    | After the completion of the following research and the related manuscript has been published. |
| 10                  | Any other restrictions?                                                                                                                             | Not for commercial.                                                                           |
