# Supplementary material for: The role of the vaginal microbiome in distinguishing female chronic pelvic pain caused by endometriosis/adenomyosis
Source: PubMed Central journal article supplement — Ann Transl Med. 2021 May;9(9):771. doi: 10.21037/atm-20-4586 (PMC8246188; doi:10.21037/atm-20-4586), 2021-05
Supplement: atm-09-09-771-supplementary.pdf [file atm-09-09-771-supplementary.pdf]

**Appendix 1 (1)**

1. DNA extraction;
2. Amplification of bacterial 16S rRNA V4 gene region and sequence;
3. Data analysis.

**Reference**

1. Chao X, Sun T, Wang S, et al. Research of the potential biomarkers in vaginal microbiome for persistent high-risk human papillomavirus infection. *Ann Transl Med* 2020;8:100.

**Table S1** Comparison of different methods in the diagnosis CPPS associated with EM/AM

|                         | CPPS due to EM/AM (n) | CPPS without EM/AM (n) |                                                     |
|-------------------------|-----------------------|------------------------|-----------------------------------------------------|
| Training set            |                       |                        |                                                     |
| Suspected by method A   | 30                    | 12                     | PPN=71.43%; NPV=65.00%;<br>SEN=81.08%; SPE=52.00%   |
| Unsuspected by method A | 7                     | 13                     |                                                     |
| Suspected by method B   | 15                    | 0                      | PPN=100.00%; NPV=53.19%;<br>SEN=40.54%; SPE=100.00% |
| Unsuspected by method B | 22                    | 25                     |                                                     |
| Suspected by method C   | 33                    | 12                     | PPN=73.33%; NPV=76.47%;<br>SEN=89.19%; SPE=52.00%   |
| Unsuspected by method C | 4                     | 13                     |                                                     |
| Validation trial        |                       |                        |                                                     |
| Suspected by method A   | 35                    | 32                     | PPN=52.24%; NPV=71.15%;<br>SEN=70.00%; SPE=53.62%   |
| Unsuspected by method A | 15                    | 37                     |                                                     |
| Suspected by method B   | 23                    | 6                      | PPN=79.31%; NPV=70.00%;<br>SEN=46.00%; SPE=100.00%  |
| Unsuspected by method B | 27                    | 63                     |                                                     |
| Suspected by method C   | 43                    | 34                     | PPN=55.84%; NPV=83.33%;<br>SEN=86.00%; SPE=50.72%   |
| Unsuspected by method C | 7                     | 35                     |                                                     |

Method A refers to the relative abundance of *Clostridium disporicum* being over 0.01105% with that of *Lactobacillus reuteri* being under 0.1911349%. Method B refers to the relative abundance of *Clostridium disporicum* being over 0.01105% with that of *Lactobacillus reuteri* being under 0.1911349% and serum CA125 being over 35 U/mL. CPPS, chronic pelvic pain syndrome; EM, endometriosis; AM, adenomyosis.

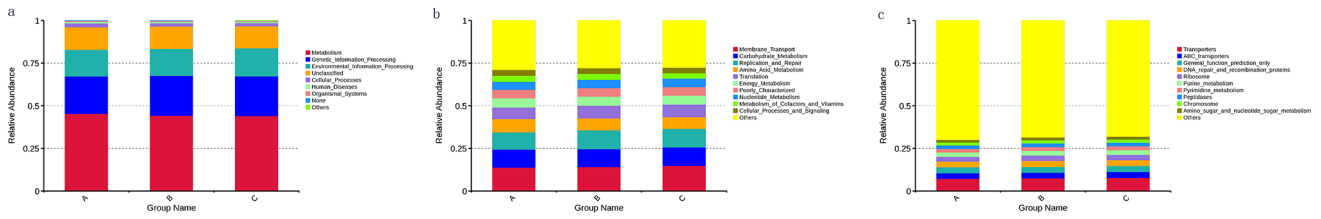

**Figure S1** The proportion of predictive functional profiling of the vaginal microbiome in the 3 groups. (A) Bar chart showing the relative proportion of gene function prediction on level 1 of each group. (B) Bar chart showing the relative proportion of gene function prediction on level 2 of each group. (C) Bar chart showing the relative proportion of gene function prediction on level 3 of each group.

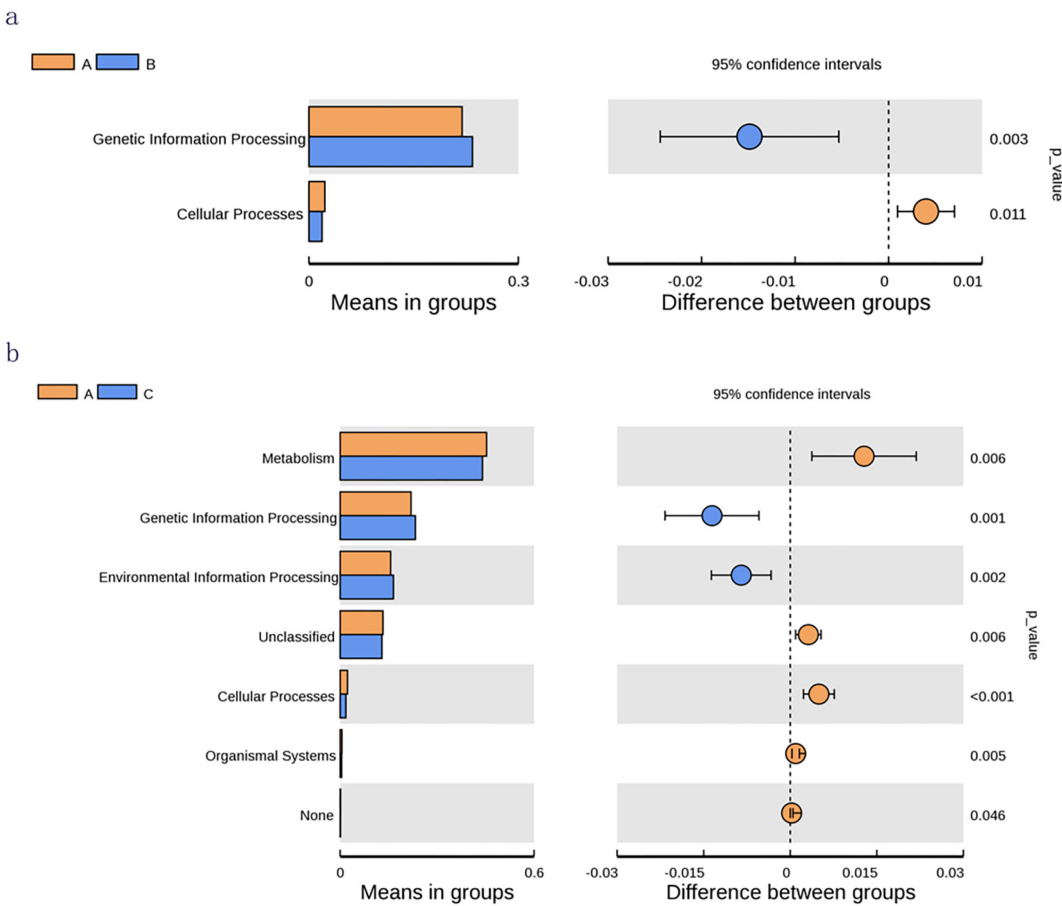

**Figure S2** PICRUSt *in silico* functional analyses of the vaginal microbiome of participants in the 3 groups on level 1. Microbial pathways were predicted to be differentially regulated based on microbiomic differences between groups. Upregulated pathways refer to a higher percentage of the mean proportion of expression. P values were calculated by the White's nonparametric t test and corrected for multiple comparisons. (A) A comparison of functional analyses between groups A and B. (B) A comparison of functional analyses between groups A and C.

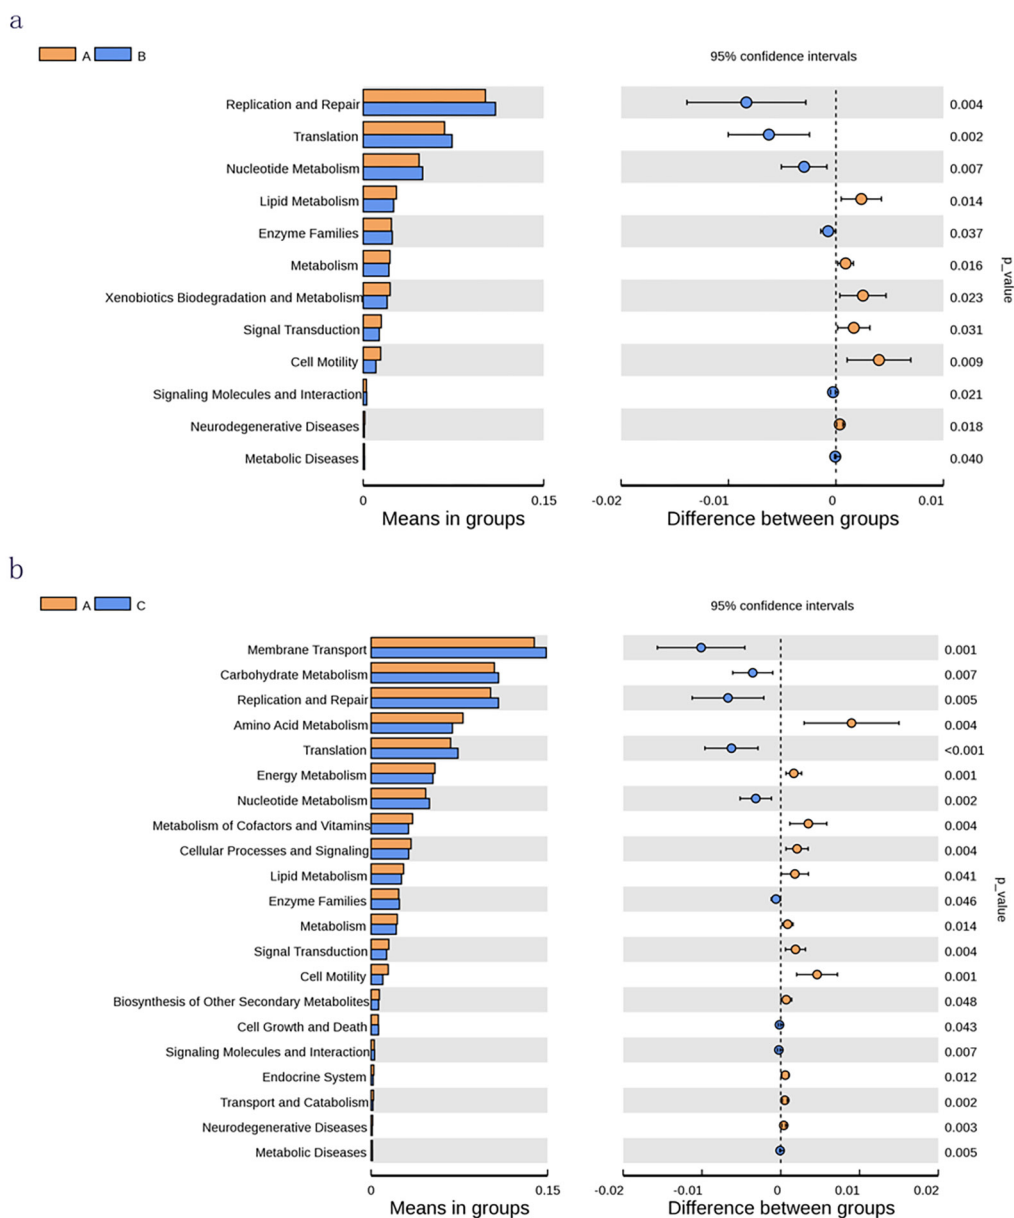

**Figure S3** PICRUST *in silico* functional analyses of the vaginal microbiome of participants in the 3 groups on level 2. Microbial pathways were predicted to be differentially regulated based on microbiomic differences between groups. Upregulated pathways refer to a higher percentage of the mean proportion of expression. P values were calculated by the White's nonparametric t test and corrected for multiple comparisons. (A) A comparison of functional analyses between groups A and B. (B) A comparison of functional analyses between groups A and C.

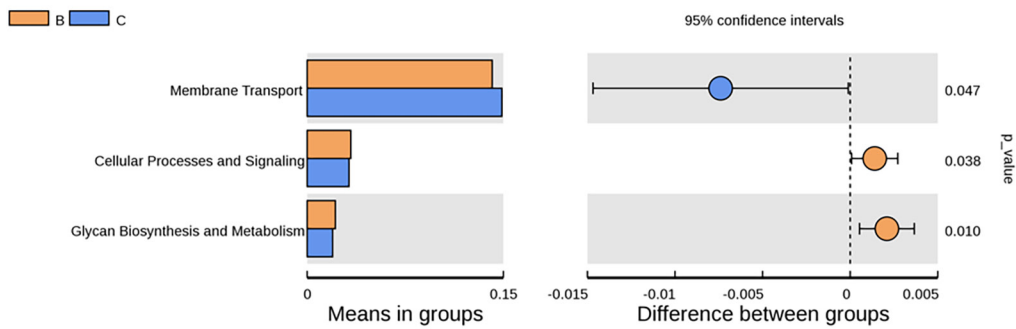

**Figure S4** PICRUSt in silico functional analyses of the vaginal microbiome of participants in group B, C on level 3. Microbial pathways were predicted to be differentially regulated based on microbiomic differences between groups. Upregulated pathways refer to a higher percentage of the mean proportion of expression. P values were calculated by the White's nonparametric t test and corrected for multiple comparisons.
